# Supplementary material for: Rice bran protein oxidation induced by rancidity alters the gut microbiota and intestinal permeability in mice
Source: Royal Society of Chemistry journal article supplement (doi:10.1039/d1fo03308e), 2022-01-01

## Supplementary Information

Rice bran protein oxidation induced by rancidity alters the gut microbiota  
and intestinal permeability in mice

Fang Li<sup>a,b</sup>, Zhuoran Kang<sup>a, b</sup>, Xiaojuan Wu<sup>a,b\*</sup>, Wei Wu<sup>a,b\*</sup>

<sup>a</sup> *College of Food Science and Engineering, Central South University of Forestry and  
Technology, 498 Southern Shaoshan Road, Changsha, Hunan 410004, P. R. China*

<sup>b</sup> *National Engineering Research Center of Rice and By-product Deep Processing, 498  
South Shaoshan Road, Changsha, Hunan 410004, P. R. China*

Table S1 Primers sequences for RT-qPCR.

| Genes    | Forward                 | Reward                  |
|----------|-------------------------|-------------------------|
| Occludin | CACGAAGGGGAAAGCAGGAA    | CCCACCTGTCGTGTAGTCTG    |
| Claudin  | ACCAACTGCGTACAAGACGAG   | CAGAGCCGCCAACAGGAAA     |
| ZO-1     | ACCCGAAACTGATGCTGTGGATA | AAATGGCCGGGCAGAGTACGCTG |
| GAPDH    | GCATCCTCTTCCTCCCTGG     | CGGATGTCAACGTCACACTT    |

Fig. S1. Effects of oxidized RBP on the body weight of mice.

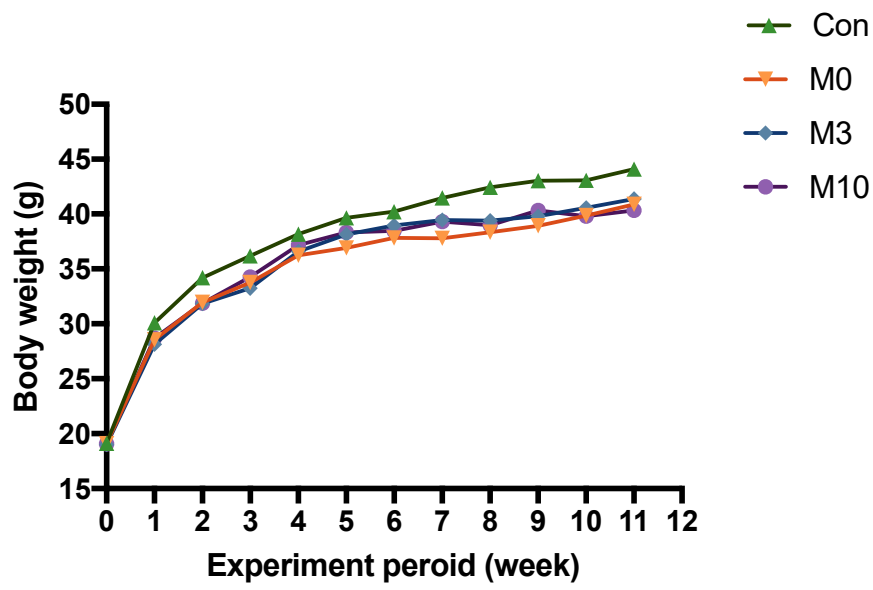

Supplement: d1fo03308e1.pdf [file d1fo03308e1.pdf]
